# Supplementary material for: A Pilot Study on Efficacy of Lipid Bubbles for Theranostics in Dogs with Tumors
Source: MDPI journal article supplement (doi:10.3390/cancers12092423), 2020-08-26
Supplement: s1 [file s1]

## Article

# A Pilot Study on Efficacy of Lipid Bubbles for Theranostics in Dogs with Tumors

Inoru Yokoe <sup>1</sup>, Yusuke Murahata <sup>1</sup>, Kazuki Harada <sup>1</sup>, Yuji Sunden <sup>1</sup>, Daiki Omata <sup>2</sup>, Johan Unga <sup>2</sup>, Ryo Suzuki <sup>2</sup>, Kazuo Maruyama <sup>3</sup>, Yoshiharu Okamoto <sup>1</sup> and Tomohiro Osaki <sup>1,\*</sup>

<sup>1</sup> Joint Department of Veterinary Clinical Medicine, Faculty of Agriculture, Tottori University, 4-101 Koyama-Minami, Tottori 680-8553, Japan; inoru.y@gmail.com (I.Y.); ymurahata@muses.tottori-u.ac.jp (Y.M.); k-harada@tottori-u.ac.jp (K.H.); sunden@tottori-u.ac.jp (Y.S.); yokamoto@muses.tottori-u.ac.jp (Y.O.)

<sup>2</sup> Laboratory of Drug and Gene Delivery Research, Faculty of Pharma-Science, Teikyo University, 2-11-1 Kaga, Itabashi-ku, Tokyo 173-8605, Japan; omata@pharm.teikyo-u.ac.jp (D.O.); johan.unga@gmail.com (J.U.); r-suzuki@pharm.teikyo-u.ac.jp (R.S.)

<sup>3</sup> Laboratory of Theranostics, Faculty of Pharma-Science, Teikyo University, 2-11-1 Kaga, Itabashi-ku, Tokyo 173-8605, Japan; maruyama@pharm.teikyo-u.ac.jp (K.M.)

\* Correspondence: tosaki@muses.tottori-u.ac.jp; Tel.: +81-857-31-5434; Fax: +81-857-31-5434

## Supplementary Material

### Anti-tumor effects of LBs combined with US and liposomal doxorubicin

**Table S1.** Summary of the three dogs included in the clinical study of the combination treatment of LBs, US, and Doxil.

| 9 | Breed       | Age (y) | Sex           | Weight (kg) | Tumor type                      | Tumor site | Simultaneous therapy |
|---|-------------|---------|---------------|-------------|---------------------------------|------------|----------------------|
| 1 | Papillon    | 14      | Spayed female | 2.5         | Hemangiopericytoma              | Perianal   | None                 |
| 2 | Toy Poodle  | 7       | Female        | 3.8         | Ceruminous gland adenocarcinoma | Left ear   | None                 |
| 3 | Welsh Corgi | 10      | Female        | 10.1        | Thyroid carcinoma (suspected)   | Thyroid    | Toceranib            |

**Table S2.** Summary of the clinical course and treatment of case No. 1.

| Day | Events                                                         | Tumor size (cm <sup>3</sup> ) | Doxil dose (mg/m <sup>2</sup> ) | LBs dose (mL)    | Frequency (MHz)  | US output setting Power Intensity (W/cm <sup>2</sup> ) | Duty Cycle (%)   | Time (min)       |
|-----|----------------------------------------------------------------|-------------------------------|---------------------------------|------------------|------------------|--------------------------------------------------------|------------------|------------------|
| 0   | Inclusion                                                      | 178.0                         | 16                              | 0.2              | 1                | 2                                                      | 50               | 30               |
| 9   | 1st treatment                                                  | 175.7                         | 16                              | 0.2              | 1                | 2                                                      | 50               | 20               |
| 23  | 2nd treatment                                                  | 85.6                          | n/a <sup>1</sup>                | n/a <sup>1</sup> | n/a <sup>1</sup> | n/a <sup>1</sup>                                       | n/a <sup>1</sup> | n/a <sup>1</sup> |
| 28  | Poor general condition<br>Treatment postponed                  | 77.8                          | n/a <sup>1</sup>                | n/a <sup>1</sup> | n/a <sup>1</sup> | n/a <sup>1</sup>                                       | n/a <sup>1</sup> | n/a <sup>1</sup> |
| 52  | Slight improvement of general condition<br>Treatment postponed | n/a <sup>1</sup>              | n/a <sup>1</sup>                | n/a <sup>1</sup> | n/a <sup>1</sup> | n/a <sup>1</sup>                                       | n/a <sup>1</sup> | n/a <sup>1</sup> |
| 52  | Death                                                          | n/a <sup>1</sup>              | n/a <sup>1</sup>                | n/a <sup>1</sup> | n/a <sup>1</sup> | n/a <sup>1</sup>                                       | n/a <sup>1</sup> | n/a <sup>1</sup> |

<sup>1</sup> n/a, not assessed.

**Table S3.** Summary of the clinical course and treatment of case No. 2.

| Day | Events    | Tumor size (cm <sup>3</sup> ) | Doxil dose (mg/m <sup>2</sup> ) | LBs dose (mL) | Frequency (MHz) | US output setting Power Intensity (W/cm <sup>2</sup> ) | Duty Cycle (%) | Time (min) |
|-----|-----------|-------------------------------|---------------------------------|---------------|-----------------|--------------------------------------------------------|----------------|------------|
| 0   | Inclusion | 4.4                           | 16                              | 0.2           | 1               | 2                                                      | 50             | 15         |

|     |                                 |                  |                  |                  |                  |                  |                  |                  |
|-----|---------------------------------|------------------|------------------|------------------|------------------|------------------|------------------|------------------|
|     | <b>CT examination</b>           |                  |                  |                  | 1                | 2                | 100              | 15               |
|     | <b>1<sup>st</sup> treatment</b> |                  |                  |                  |                  |                  |                  |                  |
| 7   | 2 <sup>nd</sup> treatment       | 3.7              | 16               | 0.2              | 1                | 2                | 50               | 40               |
| 29  | CT examination                  | 3.7              | 8                | 0.4              | 1                | 2                | 50               | 40               |
|     | 3 <sup>rd</sup> treatment       |                  |                  |                  |                  |                  |                  |                  |
| 43  | 4 <sup>th</sup> treatment       | 2.7              | 8                | 0.4              | 1                | 2                | 50               | 30               |
| 57  | 5 <sup>th</sup> treatment       | 2.9              | 12.5             | 0.2              | 1                | 2                | 50               | 30               |
| 71  | 6 <sup>th</sup> treatment       | 2.4              | 14.2             | 0.4              | 1                | 2                | 50               | 30               |
| 78  | Inflammation of the lesion      | n/a <sup>1</sup> | n/a <sup>1</sup> | n/a <sup>1</sup> | n/a <sup>1</sup> | n/a <sup>1</sup> | n/a <sup>1</sup> | n/a <sup>1</sup> |
|     | Treatment postponed             |                  |                  |                  |                  |                  |                  |                  |
| 113 | Poor general condition          | n/a <sup>1</sup> | n/a <sup>1</sup> | n/a <sup>1</sup> | n/a <sup>1</sup> | n/a <sup>1</sup> | n/a <sup>1</sup> | n/a <sup>1</sup> |
|     | Treatment postponed             |                  |                  |                  |                  |                  |                  |                  |
| 127 | Death                           | n/a <sup>1</sup> | n/a <sup>1</sup> | n/a <sup>1</sup> | n/a <sup>1</sup> | n/a <sup>1</sup> | n/a <sup>1</sup> | n/a <sup>1</sup> |

<sup>1</sup> n/a, not assessed.**Table S4.** Summary of the clinical course and treatment of case No. 3.

| Day | Events                          | Tumor size (cm <sup>3</sup> ) | Doxil dose (mg/m <sup>2</sup> ) | LBs dose (mL)    | Frequency (MHz)  | US output setting Power Intensity (W/cm <sup>2</sup> ) | Duty Cycle (%)   | Time (min)       |
|-----|---------------------------------|-------------------------------|---------------------------------|------------------|------------------|--------------------------------------------------------|------------------|------------------|
|     | <b>Inclusion</b>                |                               |                                 |                  |                  |                                                        |                  |                  |
| 0   | <b>CT examination</b>           | <b>41.0</b>                   | <b>15</b>                       | 0.2              | 1                | 2                                                      | 50               | 15               |
|     | <b>1<sup>st</sup> treatment</b> |                               |                                 |                  |                  |                                                        |                  |                  |
| 15  | 2 <sup>nd</sup> treatment       | 28.3                          | 15                              | 0.3              | 1                | 2                                                      | 50               | 15               |
| 36  | 3 <sup>rd</sup> treatment       | 38.2                          | 15                              | 0.3              | 1                | 2                                                      | 50               | 15               |
|     | CT examination                  |                               |                                 |                  |                  |                                                        |                  |                  |
| 58  | 4 <sup>th</sup> treatment       | 16.6                          | 15                              | 0.3              | 1                | 2                                                      | 50               | 15               |
| 82  | Poor general condition          | 18.1                          | n/a <sup>1</sup>                | n/a <sup>1</sup> | n/a <sup>1</sup> | n/a <sup>1</sup>                                       | n/a <sup>1</sup> | n/a <sup>1</sup> |
|     | Treatment postponed             |                               |                                 |                  |                  |                                                        |                  |                  |
| 83  | Poor general condition          | n/a <sup>1</sup>              | n/a <sup>1</sup>                | n/a <sup>1</sup> | n/a <sup>1</sup> | n/a <sup>1</sup>                                       | n/a <sup>1</sup> | n/a <sup>1</sup> |
|     | The last follow-up              |                               |                                 |                  |                  |                                                        |                  |                  |

<sup>1</sup> n/a, not assessed.
